# Supplementary material for: Synthesis, fabrication and characterization of 2-naphthyloxy group-substituted bis(2-pyridylimino)isoindoline and its derivatives as a positive electrode for vanadium redox flow battery applications
Source: Royal Society of Chemistry journal article supplement (doi:10.1039/d2dt03547b), 2023-01-01
Supplement: d2dt03547b1.pdf [file d2dt03547b1.pdf]

**Electronic Supplementary Material (ESI)**

**Synthesis, fabrication and characterization of 2-naphthyloxy  
group-substituted bis(2-pyridylimino)isoindoline and its  
derivatives as positive electrode for vanadium redox flow battery  
applications**

Selin Gümrükçü<sup>a</sup>, Mukaddes Özçeşmeci<sup>a</sup>, Nilüfer Koçyiğit<sup>b</sup>, Kerem Kaya<sup>a</sup>, Ahmet Gül<sup>a</sup>,  
Yücel Şahin<sup>c\*</sup>, İbrahim Özçeşmeci<sup>a\*</sup>

<sup>a</sup>Istanbul Technical University, Department of Chemistry, TR-34469, Maslak, Istanbul,  
Turkey

<sup>b</sup>Biruni University, Department of Basic Pharmaceutical Sciences, Faculty of Pharmacy,  
TR34010, Istanbul, Turkey

<sup>c</sup>Yildiz Technical University, Faculty of Arts & Sciences, Department of Chemistry, TR34220  
Istanbul, Turkey

## Table of Contents

**Figure S1.** FT-IR spectrum of **BPI** and **PdBPI**.

**Figure S2.** UV-vis spectra of **BPI** and **PdBPI** in DMF ( $5 \times 10^{-5}$  M).

**Figure S3.**  $^1\text{H}$ -NMR spectrum of **BPI** in  $\text{CDCl}_3$ .

**Figure S4.**  $^{13}\text{C}$ -NMR spectrum of **BPI** in  $\text{CDCl}_3$ .

**Figure S5.**  $^1\text{H}$ -NMR spectrum of **PdBPI** in  $\text{CDCl}_3$ .

**Figure S6.**  $^{13}\text{C}$ -NMR spectrum of **PdBPI** in  $\text{CDCl}_3$ .

**Figure S7.** MALDI TOFF MS spectrum of **BPI**.

**Figure S8.** MALDI TOFF MS spectrum of **PdBPI**.

**Figure S9.** SEM images of PGE/BPI (a) and PGE/PdBPI (c), and EDX elemental mapping results of PGE/BPI (b) and PGE/PdBPI (d).

**Figure S10.** XPS Survey spectra of BPI-CF (a) and PdBPI-CF (b).

**Figure S11.** Electrochemical stability test of **PGE/BPI**.

**Figure S12.** Electrochemical stability test of **PGE/PdBPI**.

**Table S1.** Structure refinement parameters of **BPI** and **PdBPI**.

**Table S2.** Selected bond lengths ( $\text{\AA}$ ) **BPI** and **PdBPI**.

**Table S3.** Selected bond angles ( $^\circ$ ) **BPI** and **PdBPI**.

**Table S4.** Comparison of CE, EE and VE based on previous reported studies.

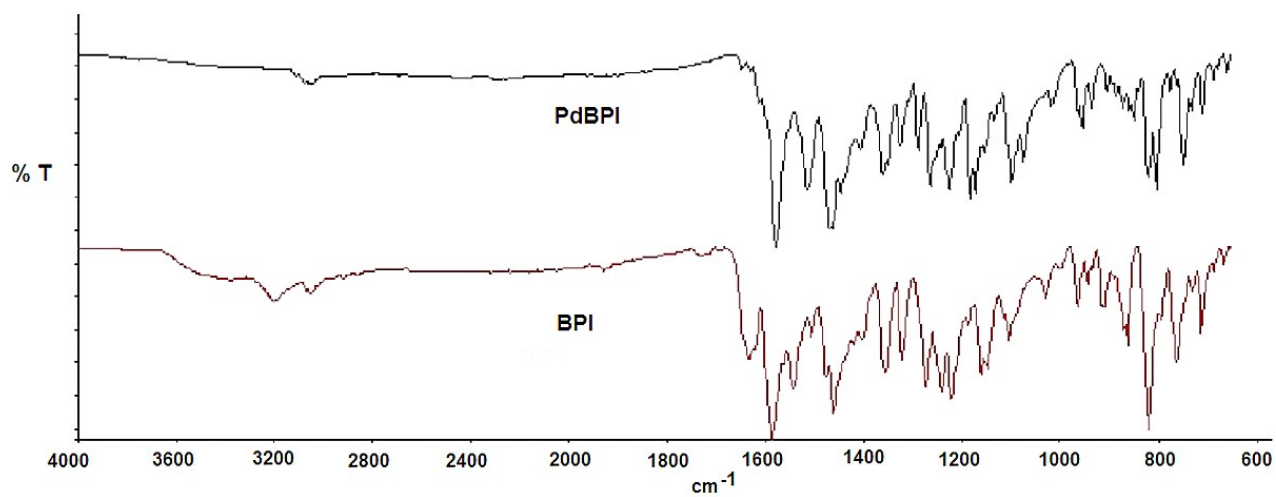

**Figure S1.** FT-IR spectrum of **BPI** and **PdBPI**.

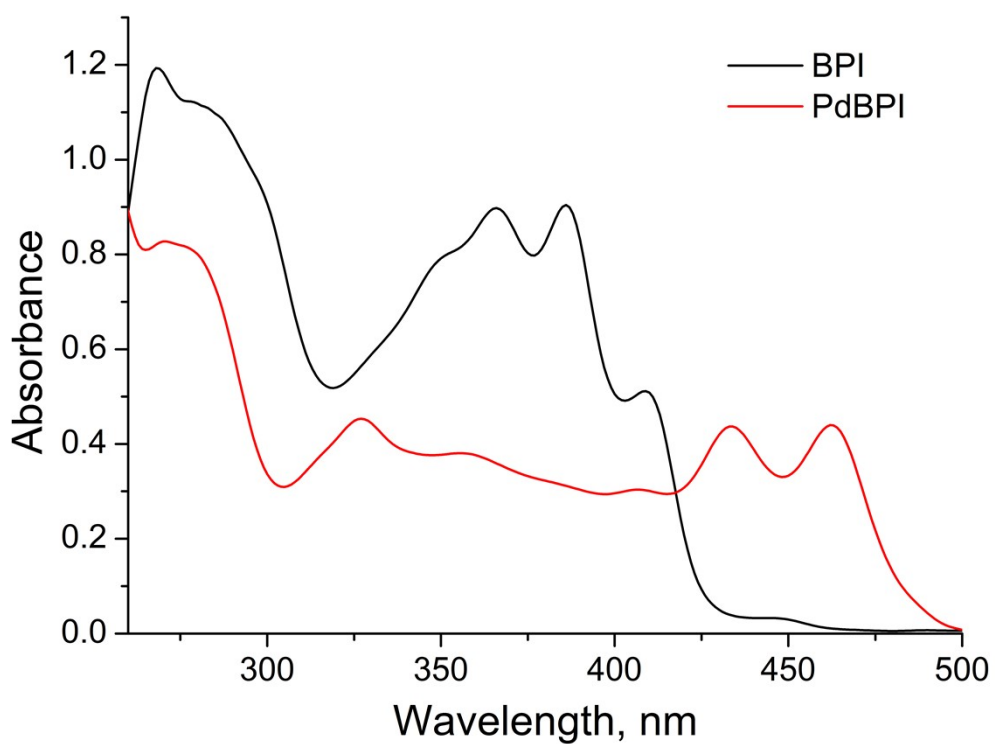

**Figure S2.** UV-vis spectra of **BPI** and **PdBPI** in DMF ( $5 \times 10^{-5}$  M).

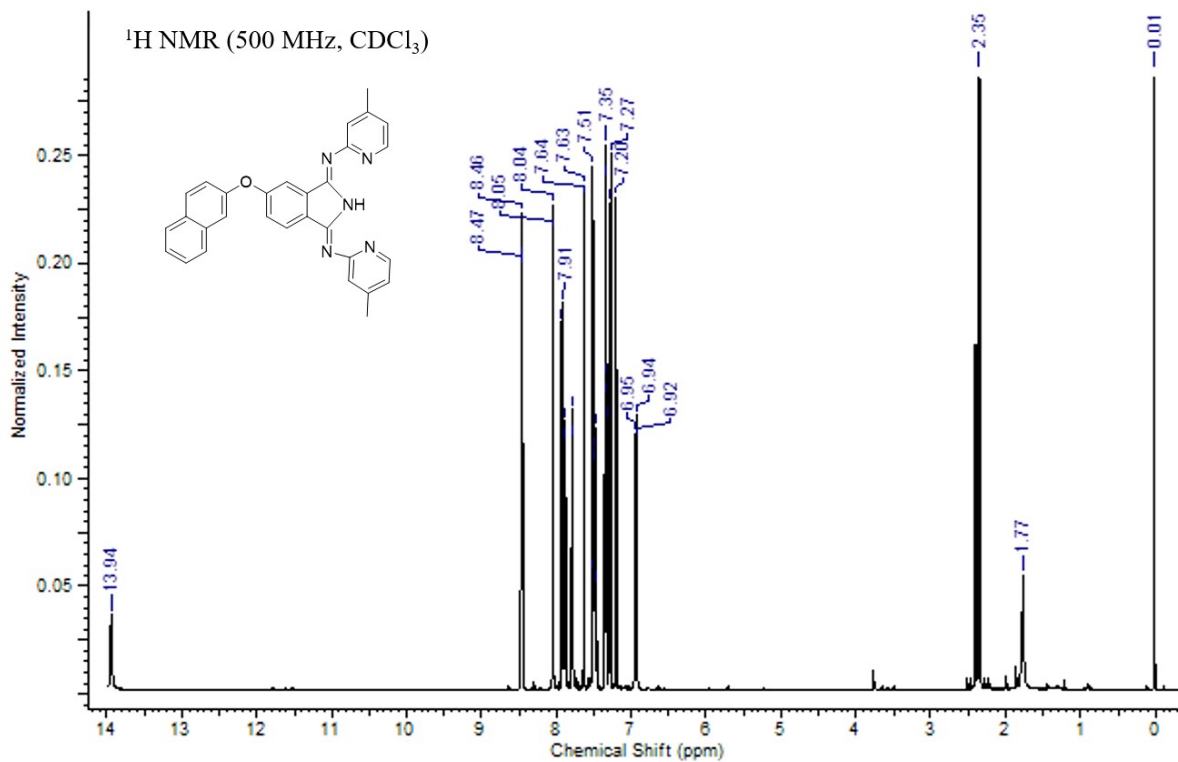

Figure S3. <sup>1</sup>H-NMR spectrum of **BPI** in CDCl<sub>3</sub>.

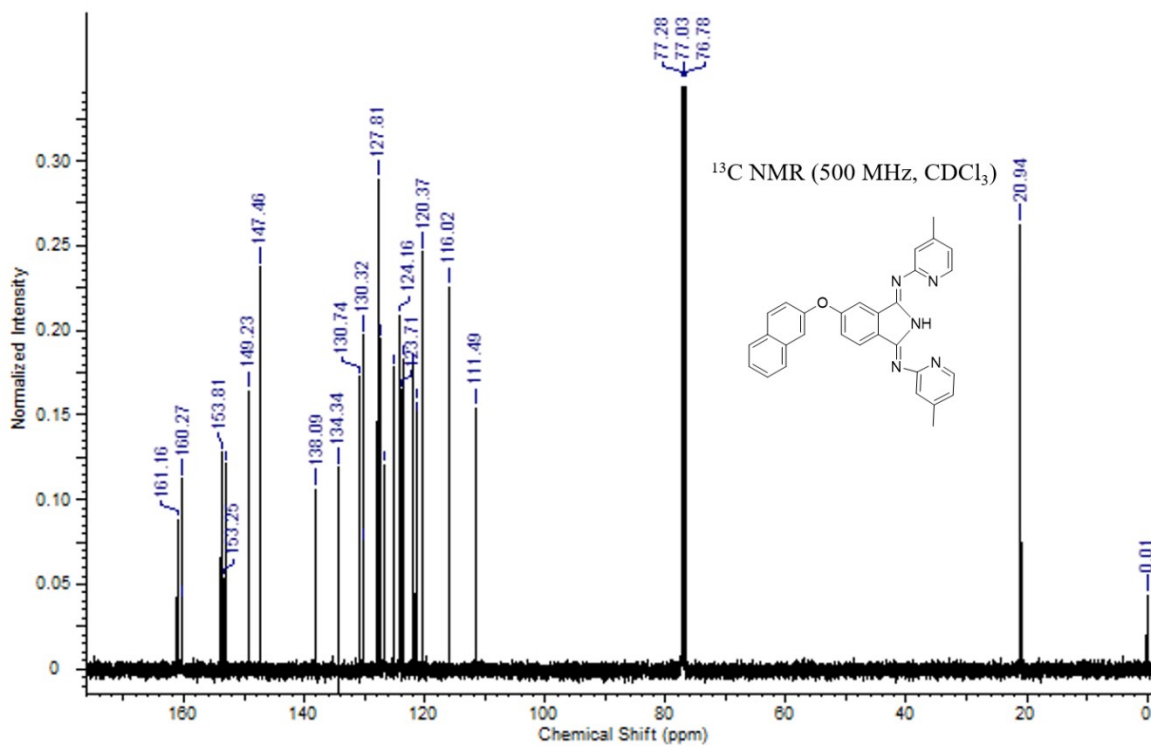

Figure S4. <sup>13</sup>C-NMR spectrum of **BPI** in CDCl<sub>3</sub>

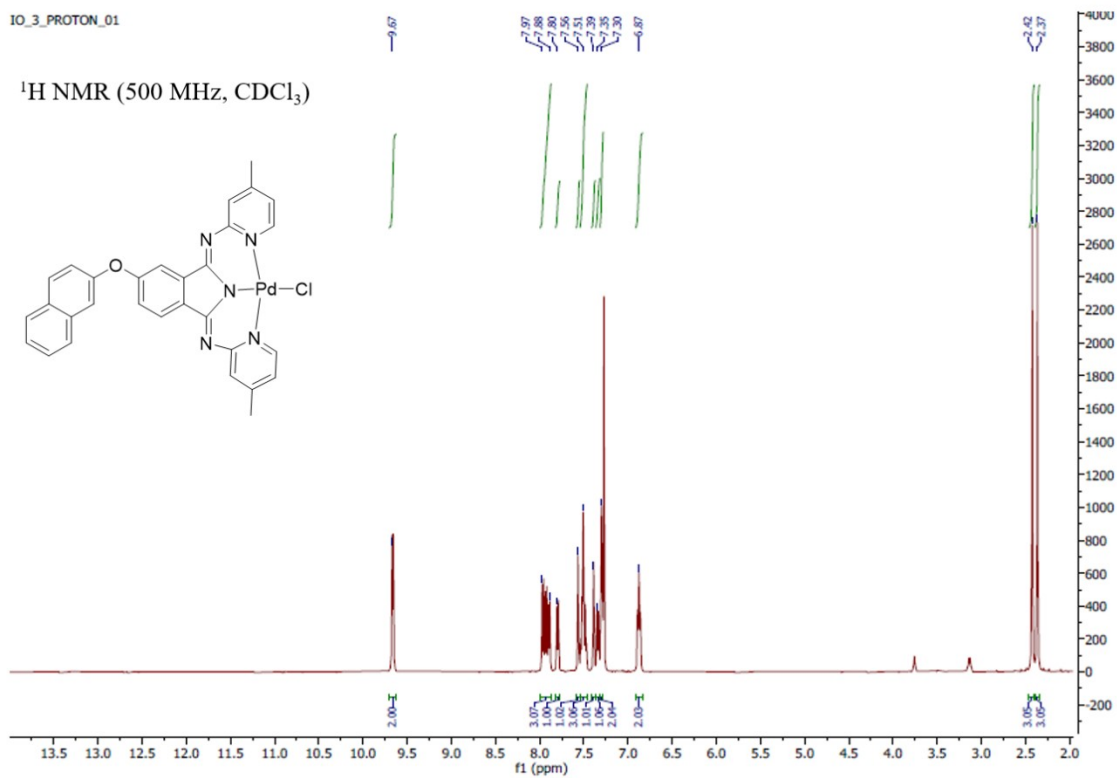

Figure S5. <sup>1</sup>H-NMR spectrum of PdBPI in CDCl<sub>3</sub>.

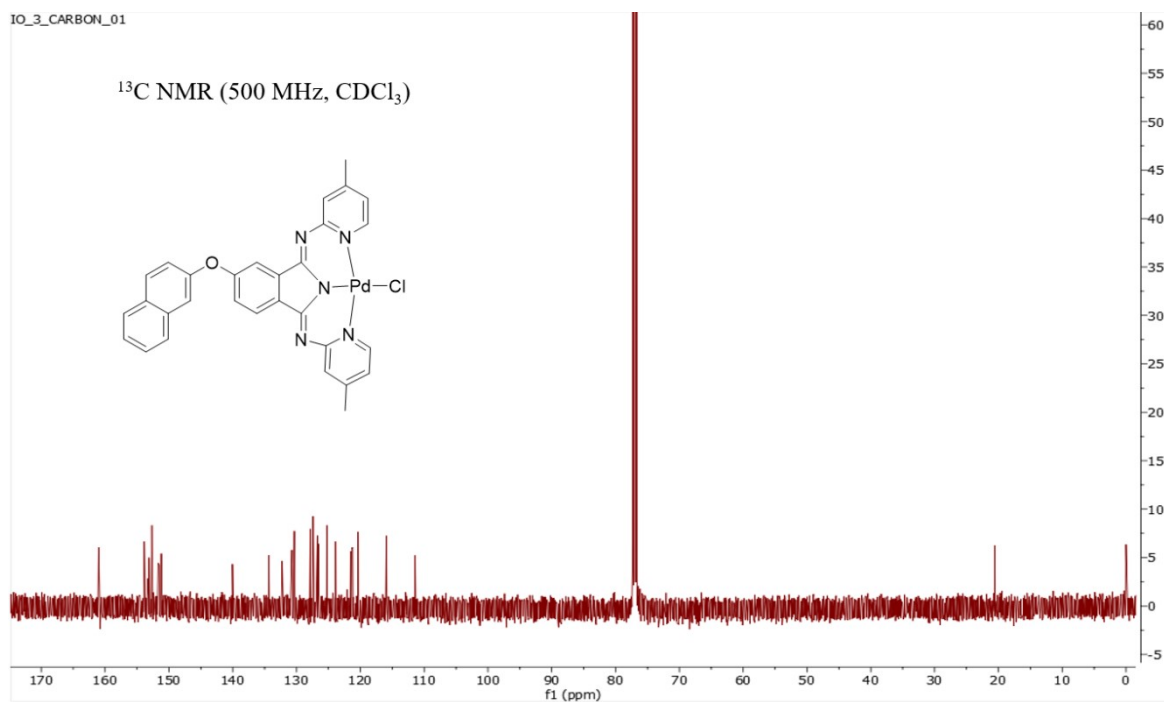

Figure S6. <sup>13</sup>C-NMR spectrum of PdBPI in CDCl<sub>3</sub>.

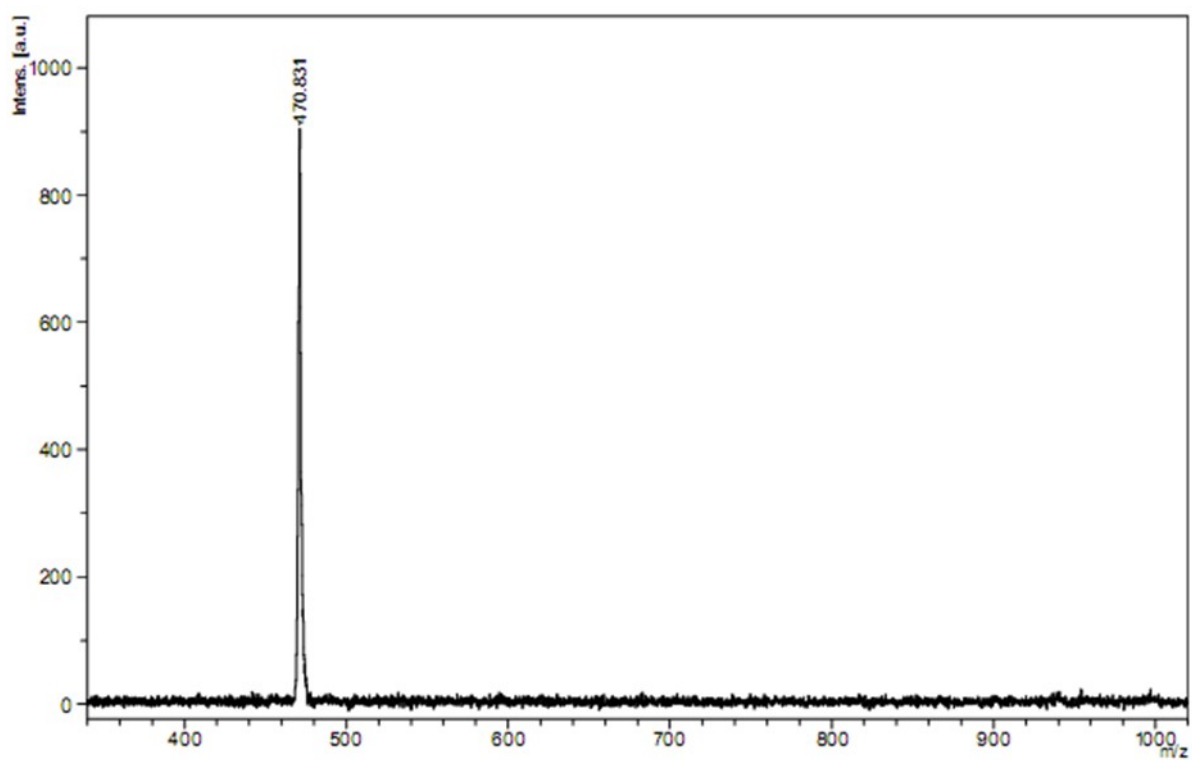

Figure S7. MALDI-TOFF MS spectrum of BPI.

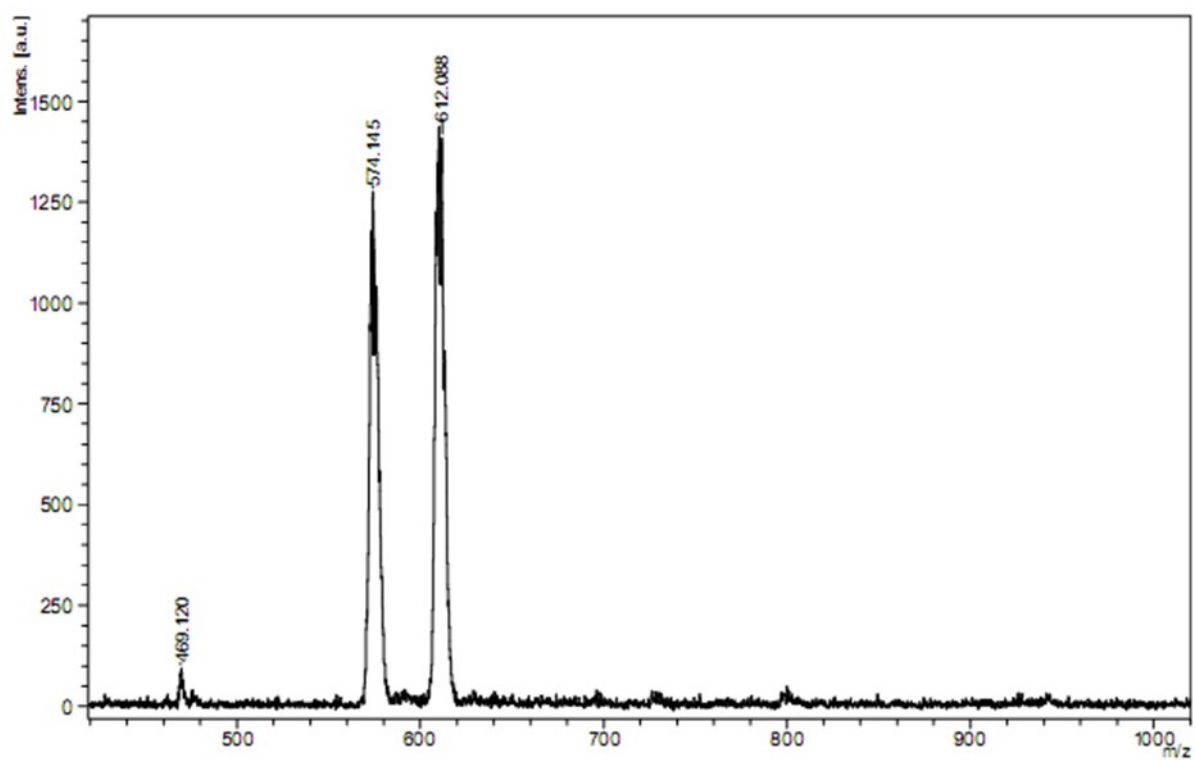

Figure S8. MALDI-TOFF MS spectrum of PdBPI.

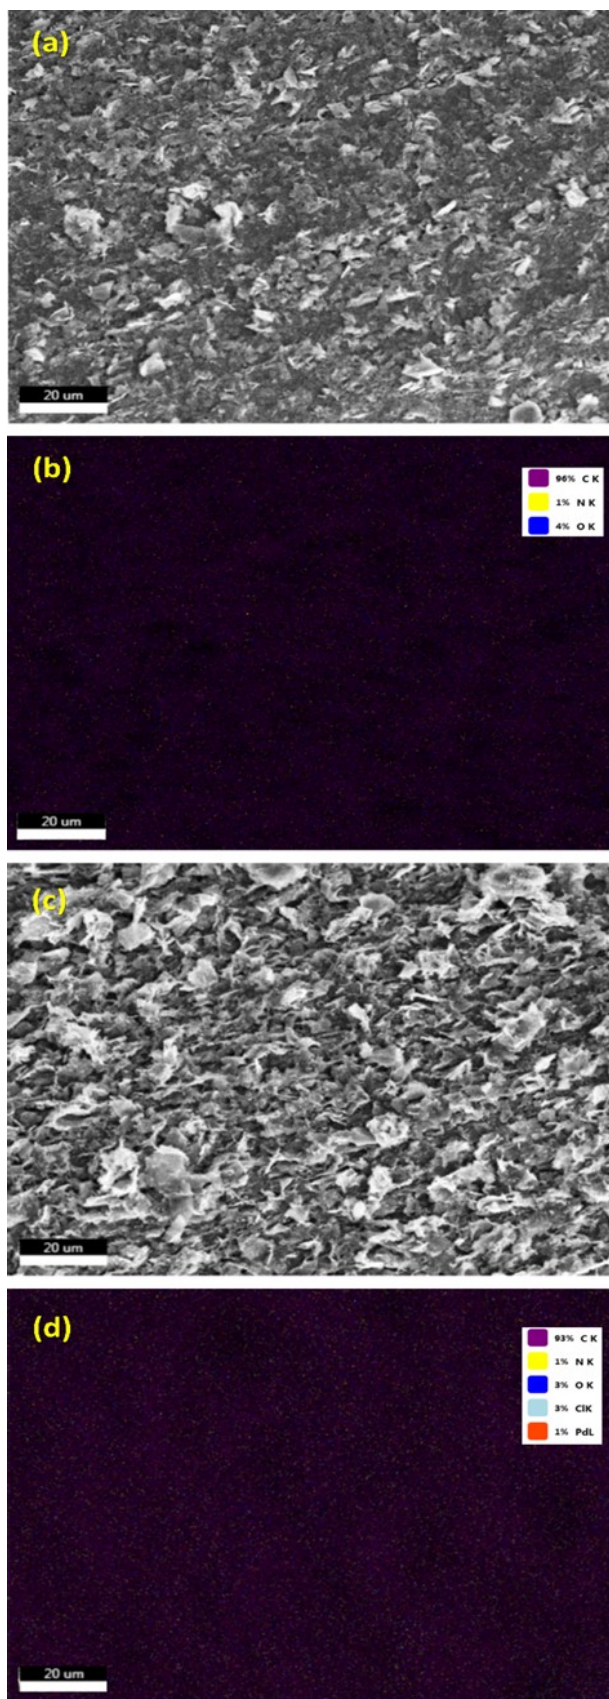

**Figure S9.** SEM images of PGE/BPI (a) and PGE/PdBPI (c), and EDX elemental mapping results of PGE/BPI (b) and PGE/PdBPI (d).

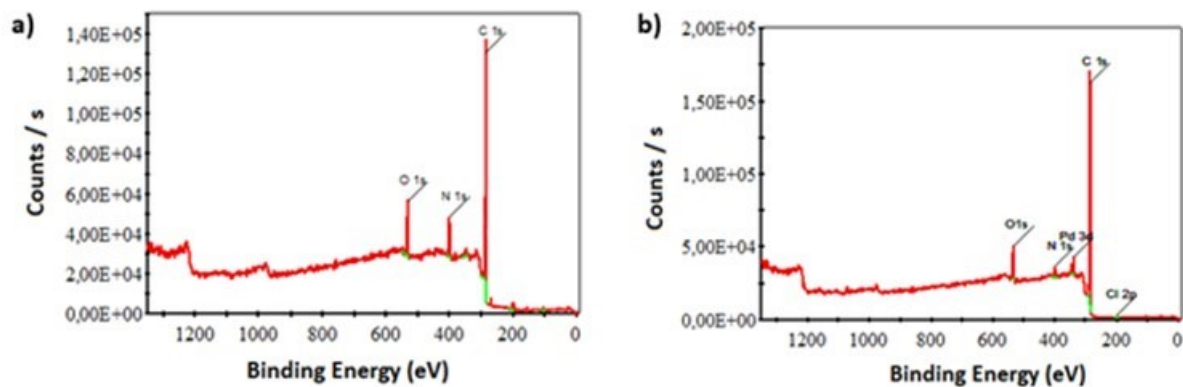

Figure S10. XPS Survey spectra of BPI-CF (a) and PdBPI-CF (b).

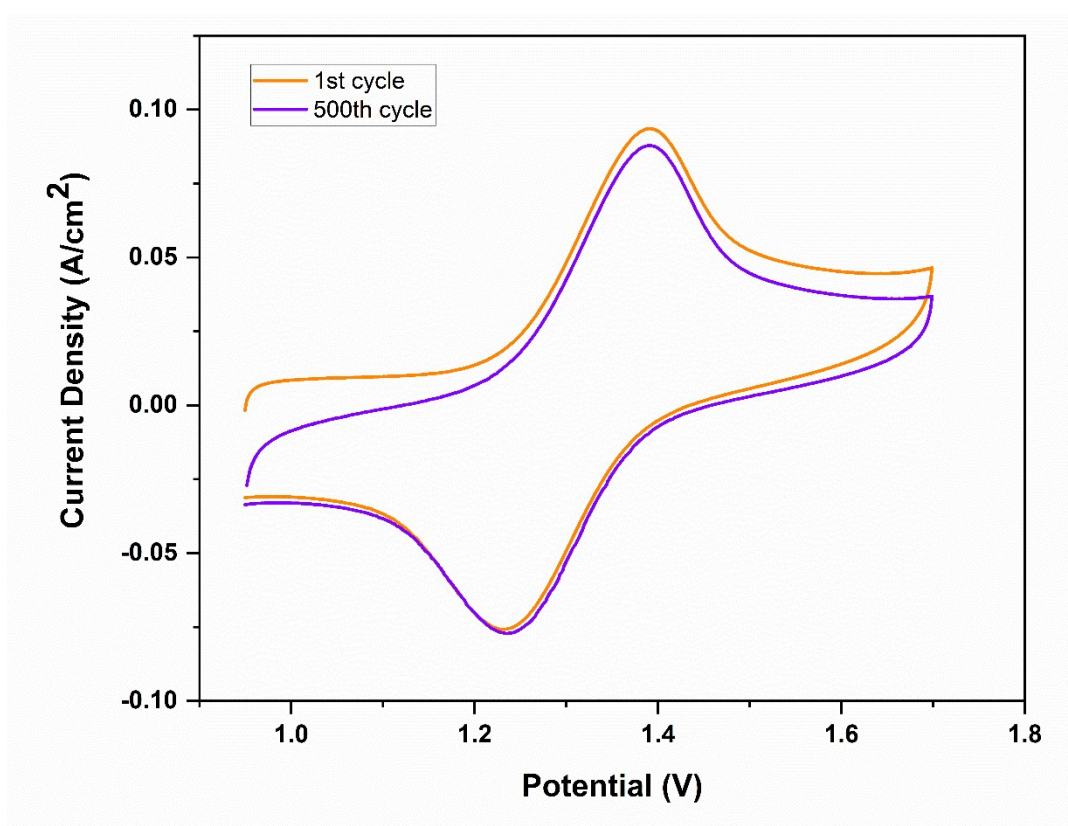

Figure S11. Electrochemical stability test of PGE/BPI.



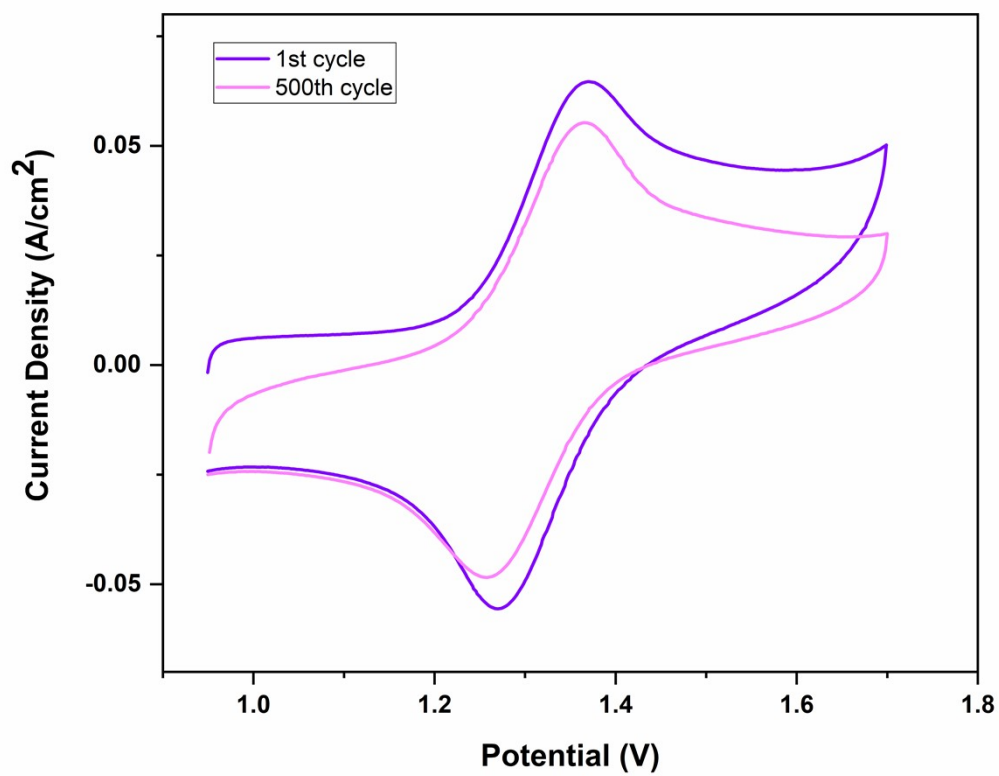

**Figure S12.** Electrochemical stability test of PGE/PdBPI.

**Table S1.** Structure refinement parameters of **BPI** and **PdBPI**.

|                                                                             | <b>BPI</b>                                                               | <b>PdBPI</b>                                                               |
|-----------------------------------------------------------------------------|--------------------------------------------------------------------------|----------------------------------------------------------------------------|
| <b>Empirical formula</b>                                                    | $C_{30}H_{23}N_5O$                                                       | $C_{30}H_{22}ClN_5OPd$                                                     |
| <b>T(K)</b>                                                                 | 306(0)                                                                   | 303(2)                                                                     |
| <b><math>\lambda(\text{\AA})</math></b>                                     | 0.71073                                                                  | 0.71073                                                                    |
| <b>Crystal system</b>                                                       | triclinic                                                                | triclinic                                                                  |
| <b>Space group</b>                                                          | P -1                                                                     | P -1                                                                       |
| <b>Unit cell dimensions: (<math>\text{\AA}</math>, <math>^\circ</math>)</b> |                                                                          |                                                                            |
| <b>a</b>                                                                    | 6.3202(3)                                                                | 8.6324(9)                                                                  |
| <b>b</b>                                                                    | 10.3082(5)                                                               | 10.5581(12)                                                                |
| <b>c</b>                                                                    | 19.4392(9)                                                               | 16.7354(17)                                                                |
| <b><math>V(\text{\AA}^3)</math></b>                                         | 1228.62(9)                                                               | 1412.2(3)                                                                  |
| <b><math>\alpha</math></b>                                                  | 82.097(2)                                                                | 79.298(7)                                                                  |
| <b><math>\beta</math></b>                                                   | 83.015(2)                                                                | 87.886(7)                                                                  |
| <b><math>\gamma</math></b>                                                  | 79.848(2)                                                                | 70.496 (7)                                                                 |
| <b>Z</b>                                                                    | 2                                                                        | 2                                                                          |
| <b>Absorption coefficient (<math>\text{mm}^{-1}</math>)</b>                 | 0.080                                                                    | 0.783                                                                      |
| <b><math>D_{\text{calc}}</math> (<math>\text{g}/\text{cm}^3</math>)</b>     | 1.269                                                                    | 1.435                                                                      |
| <b>F(000)</b>                                                               | 492                                                                      | 616                                                                        |
| <b>Crystal size (mm)</b>                                                    | 0.03 x 0.30 x 0.60                                                       | 0.05 x 0.100 x 0.783                                                       |
| <b><math>\theta</math> range for data collection (<math>^\circ</math>)</b>  | 2.39 to 25.00                                                            | 2.22 to 25.00                                                              |
| <b>Index ranges</b>                                                         | -7 $\leq$ h $\leq$ 7<br>-12 $\leq$ k $\leq$ 12<br>-23 $\leq$ l $\leq$ 23 | -10 $\leq$ h $\leq$ 10<br>-12 $\leq$ k $\leq$ 12<br>-19 $\leq$ l $\leq$ 19 |
| <b>Reflections collected</b>                                                | 51037                                                                    | 20957                                                                      |
| <b>Independent reflections</b>                                              | 4334                                                                     | 4965                                                                       |
| <b>Coverage of independent reflections (%)</b>                              | 99.9                                                                     | 99.6                                                                       |
| <b>Data/parameters</b>                                                      | 4334/327                                                                 | 4965/345                                                                   |
| <b>Final R indices [<math>I \geq 2\sigma(I)</math>]</b>                     | R1 = 0.0448<br>wR2 = 0.111                                               | R1 = 0.0824<br>wR2 = 0.2033                                                |
| <b>R indices (all data)</b>                                                 | R1 = 0.0715<br>wR2 = 0.1275                                              | R1 = 0.1901<br>wR2 = 2409                                                  |
| <b>Goodness-of-fit on <math>F^2</math></b>                                  | 1.049                                                                    | 1.097                                                                      |
| <b>Largest difference in peak and hole (<math>e \text{\AA}^{-3}</math>)</b> | 0.350/-0.140                                                             | 1.101/-0.739                                                               |

**Table S2.** Selected bond lengths ( $\text{\AA}$ ) **BPI** and **PdBPI**.

| <b>BPI</b> |     |          | <b>PdBPI</b> |     |          |
|------------|-----|----------|--------------|-----|----------|
| N3         | H13 | 0.86     | Pd           | N1  | 2.05(1)  |
| H13        | N1  | 2.089    | Pd           | N3  | 1.921(8) |
| N3         | C14 | 1.377(2) | Pd           | N5  | 2.05(1)  |
| C14        | N4  | 1.285(2) | Pd           | Cl  | 2.330(3) |
| N3         | C13 | 1.379(2) | N3           | C14 | 1.39(1)  |
| C13        | N2  | 1.282(2) | C14          | N4  | 1.28(2)  |
| C6         | N1  | 1.333(3) | N4           | C8  | 1.39(2)  |
| N5         | C8  | 1.344(2) | N3           | C13 | 1.36(2)  |
| C21        | O1  | 1.391(2) | C13          | N2  | 1.28(2)  |
| O1         | C20 | 1.385(2) | N2           | C6  | 1.34(1)  |
|            |     |          | C6           | N1  | 1.35(2)  |
|            |     |          | C8           | N5  | 1.34(1)  |
|            |     |          | C21          | O1  | 1.38(2)  |
|            |     |          | O1           | C20 | 1.37(1)  |
|            |     |          | C20          | C17 | 1.40(2)  |

**Table S3.** Selected bond angles (°) **BPI** and **PdBPI**.

|     |     |     |          |     |    |     |          |
|-----|-----|-----|----------|-----|----|-----|----------|
| C13 | N3  | C14 | 113.0(1) | Cl  | Pd | N1  | 91.3(3)  |
| N3  | C14 | N4  | 130.0(2) | N3  | Pd | N1  | 88.9(4)  |
| N4  | C8  | N5  | 120.6(2) | Cl  | Pd | N5  | 92.8(3)  |
| C21 | O1  | C20 | 116.7(1) | N5  | Pd | N3  | 89.7(4)  |
|     |     |     |          | N5  | C8 | N4  | 125(1)   |
|     |     |     |          | N1  | C6 | N2  | 124(1)   |
|     |     |     |          | C14 | N3 | C13 | 108.7(9) |

**Table S4.** Comparison of CE, EE and VE based on previous reported studies.

| Material | Coulombic | Energy | Voltage | Ref |
|----------|-----------|--------|---------|-----|
|----------|-----------|--------|---------|-----|

|                                                                                            | <b>Efficiency<br/>(CE) (%)</b> | <b>Efficiency<br/>(EE) (%)</b> | <b>Efficiency<br/>(VE) (%)</b> |               |
|--------------------------------------------------------------------------------------------|--------------------------------|--------------------------------|--------------------------------|---------------|
| Phosphonated<br>graphene oxide carbon<br>felt                                              | 88.4                           | 80.2                           | -                              | <b>1</b>      |
| Graphite felt treated by<br>modified Hummers method<br>(C–OH group)                        | 95.0                           | 77.2                           | 81.3                           | <b>2</b>      |
| PbO <sub>2</sub> -modified graphite felt                                                   | 99.5                           | 82.4                           | 82.0                           | <b>3</b>      |
| CoTGF                                                                                      | 89.5                           | 69.4                           | 77.6                           | <b>4</b>      |
| HF, H <sub>2</sub> O <sub>2</sub> co-modified GF<br>(GF-HF/H <sub>2</sub> O <sub>2</sub> ) | 97.3                           | 75.7                           | 77.8                           | <b>5</b>      |
| GF-H <sub>2</sub> SO <sub>4</sub> /GF-G                                                    | 99.5                           | 95.8                           | 96.3                           | <b>6</b>      |
| Hydroxylated carbon felt<br>(HCF)                                                          | 55.0                           | 51.7                           | 94.1                           | <b>7</b>      |
| Thermal oxidation<br>treatment                                                             | 95.15                          | 83.18                          | 87.41                          | <b>8</b>      |
| BPI-CF                                                                                     | 86.2                           | 75.1                           | 87.1                           | In this study |
| PdBPI-CF                                                                                   | 90.4                           | 88.8                           | 98.2                           | In this study |

## References

- 1 M. Etesami, E. Abouzari-Lotf, A. Ripin, M. Mahmoud Nasef, T. M. Ting, A. Saharkhiz and A. Ahmad, *Int. J. Hydrogen Energy*, 2018, **43**, 189–197.
- 2 X. Wu, H. Xu, Y. Shen, P. Xu, L. Lu, J. Fu and H. Zhao, *Electrochim. Acta*, 2014, **138**, 264–269.
- 3 X. Wu, H. Xu, L. Lu, H. Zhao, J. Fu, Y. Shen, P. Xu and Y. Dong, *J. Power Sources*, 2014, **250**, 274–278.
- 4 Y. Xiang and W. A. Daoud, *J. Power Sources*, 2019, **416**, 175–183.
- 5 Z. He, Y. Jiang, W. Meng, F. Jiang, H. Zhou, Y. Li, J. Zhu, L. Wang and L. Dai, *Appl. Surf. Sci.*, 2017, **423**, 111–118.
- 6 Z. González, C. Flox, C. Blanco, M. Granda, J. R. Morante, R. Menéndez and R. Santamaría, *J. Power Sources*, 2017, **338**, 155–162.
- 7 M. Zarei-Jelyani, M. Babaiee, A. Ghasemi and R. Eqra, *J. Renew. Energy Environ.*, 2016, **3**, 54–59.
- 8 A. Kaur, K. Il Jeong, S. Su Kim and J. Woo Lim, *Compos. Struct.*, 2022, **290**, 115546.
